# Supplementary material for: Induction of labour at 41 weeks versus expectant management until 42 weeks (INDEX): multicentre, randomised non-inferiority trial
Source: PubMed Central journal article supplement — BMJ. 2019 Feb 20;364:l344. doi: 10.1136/bmj.l344 (PMC6598648; doi:10.1136/bmj.l344), 2019-02-20
Supplement: kevj047580.ww1.pdf [file kevj047580.ww1.pdf]

# 1 Appendix

## 2 Per-protocol population

### 3 Perinatal outcomes

|                                             | Induction of labour<br>(n=611) | Expectant management<br>(n=647) | Relative risk<br>(95% CI) | p-value |
|---------------------------------------------|--------------------------------|---------------------------------|---------------------------|---------|
| Composite adverse perinatal outcome*        | 10 (1.6%)                      | 19 (2.9%)                       | 0.56 (0.26 to 1.19)       | 0.13†   |
| with Apgar score 5' <4 instead of <7        | 3 (0.5%)                       | 8 (1.2%)                        | 0.40 (0.11 to 1.49)       | 0.23†   |
| including arterial pH <7.05                 | 19 (3.1%)                      | 26 (4.0%)                       | 0.40 (0.11 to 1.49)       | 0.15†   |
| Stillbirth                                  | 1 (0.2%)                       | 2 (0.3%)                        | 0.53 (0.05 to 5.82)       | 1.00†   |
| Neonatal death, post-partum                 | 0 (0.0%)                       | 0 (0.0%)                        | n/a                       | -       |
| Apgar score 5 min. post-partum <sup>‡</sup> |                                |                                 |                           |         |
| <7                                          | 7 (1.1%)                       | 16 (2.5%)                       | 0.46 (0.19 to 1.12)       | 0.08    |
| <4                                          | 0 (0.0%)                       | 1 (0.2%)                        | n/a                       | -       |
| Admission neonate to                        |                                |                                 |                           |         |
| intensive care (NICU)                       | 2 (0.3%)                       | 6 (0.9%)                        | 0.35 (0.07 to 1.74)       | 0.51†   |
| medium care                                 | 39 (6.4%)                      | 48 (7.4%)                       | 0.86 (0.57 to 1.29)       | 0.45    |
| Meconium aspiration syndrome <sup>‡</sup>   | 0 (0.0%)                       | 2 (0.2%)                        | n/a                       | -       |
| Plexus brachialis injury                    | 0 (0.0%)                       | 0 (0.0%)                        | n/a                       | -       |
| Intracranial haemorrhage                    | 0 (0.0%)                       | 0 (0.0%)                        | n/a                       | -       |
| Umbilical cord pH (arterial)                |                                |                                 |                           |         |
| pH <7.05                                    | 11 (1.8%)                      | 10 (1.6%)                       | 1.12 (0.49 to 2.58)       | 0.79    |
| missing                                     | 366 (59.9%)                    | 447 (69.6%)                     | n/c                       | -       |
| Congenital abnormality                      | 11 (1.8%)                      | 12 (1.9%)                       | 0.97 (0.42 to 2.18)       | 0.94    |
| Hypoglycaemia <sup>§</sup>                  | 1 (0.2%)                       | 5 (0.8%)                        | 0.21 (0.02 to 1.81)       | 0.22†   |
| Neonatal infection / sepsis                 | 23 (3.8%)                      | 29 (4.5%)                       | 0.84 (0.49 to 1.44)       | 0.52    |
| Sex, female                                 | 305 (49.9%)                    | 337 (52.1%)                     | 0.96 (0.86 to 1.07)       | 0.44    |
| Birth weight (g; mean, sd)                  | 3,697 (414.4)                  | 3,747 (433.5)                   | -50.2 (-97.2 to -3.2)**   | 0.04    |
| Small of gestational age                    |                                |                                 |                           |         |
| <2.3 <sup>rd</sup> percentile               | 11 (1.8%)                      | 8 (1.2%)                        | 1.46 (0.59 to 3.60)       | 0.42    |
| <10 <sup>th</sup> percentile                | 40 (6.6%)                      | 46 (7.1%)                       | 0.92 (0.61 to 1.39)       | 0.69    |
| Large for gestational age                   |                                |                                 |                           |         |
| >90 <sup>th</sup> percentile                | 54 (8.8%)                      | 74 (11.4%)                      | 0.77 (0.55 to 1.08)       | 0.13    |
| >97.7 <sup>th</sup> percentile              | 12 (2.0%)                      | 22 (3.4%)                       | 0.58 (0.29 to 1.16)       | 0.12    |

4 **Perinatal outcomes (per-protocol).** Data are n (%) or mean (standard deviation). Confidence intervals are 95%.

5 NICU: Neonatal Intensive Care Unit \* Composite outcome defined as: perinatal mortality, and/or a 5-minute

6 Apgar-score below 7, and/or meconium aspiration syndrome, and/or plexus brachialis injury, and/or

7 intracranial haemorrhage, and/or NICU admission. <sup>‡</sup> Apgar score of the live births. <sup>†</sup> Fisher's exact test. <sup>‡</sup>

8 Defined as respiratory distress after birth in presence of meconium stained amniotic fluid). <sup>§</sup> Defined as

9 glucose concentration <1.9 mmol/L and need for intravenous glucose. <sup>¶</sup> Defined as clinical suspected findings,

10 or proved positive culture. \*\* Mean difference between groups with 95% confidence interval.

11

## 12 Delivery outcomes

|                                                                 | Induction of labour<br>(n=611) | Expectant management<br>(n=647) | Relative risk<br>(95% CI) | p-value  |
|-----------------------------------------------------------------|--------------------------------|---------------------------------|---------------------------|----------|
| Gestational age at delivery (days; median, IQR)                 | 288 (287 - 288)                | 290 (288 - 292)                 | -2.3 (-2.5 to -2.1)*      | <0.001 † |
| Time randomisation to delivery (days; mean, sd)                 | 2.2 (1.5)                      | 4.5 (2.9)                       | -2.2 (-2.5 to -2.0)*      | <0.001 † |
| Level of care at onset of labour                                |                                |                                 |                           |          |
| Primary care                                                    | 96 (15.7%)                     | 474 (73.3%)                     | n/c                       | -        |
| Secondary care                                                  | 515 (84.3%)                    | 173 (26.7%)                     | n/c                       | -        |
| Onset of labour                                                 |                                |                                 |                           |          |
| Spontaneous (reference)                                         | 92 (15.1%)                     | 524 (81.0%)                     | 1.00                      | -        |
| Induction                                                       | 519 (84.9%)                    | 123 (19.0%)                     | 4.47 (3.80 to 5.26)       | <0.001   |
| Mode of induction                                               |                                |                                 |                           |          |
| cervical ripening (catheter /prostaglandins)                    | 304 / 519 (58.6%)              | 71 / 123 (57.7%)                | 1.01 (0.86 to 1.20)       | 0.86     |
| amniotomy, without oxytocin                                     | 72 / 519 (13.9%)               | 12 / 123 (9.8%)                 | 1.42 (0.80 to 2.54)       | 0.23     |
| amniotomy, with oxytocin                                        | 135 / 519 (26.0%)              | 33 / 123 (26.8%)                | 0.97 (0.70 to 1.34)       | 0.85     |
| Indication for induction                                        |                                |                                 |                           |          |
| randomisation                                                   | 519 / 519 (100%)               | 0 / 123 (0.0%)                  | n/c                       | -        |
| post-term pregnancy                                             | 0 / 519 (0.0%)                 | 62 / 123 (50.4%)                | n/c                       | -        |
| fetal condition                                                 | 0 / 519 (0.0%)                 | 35 / 123 (28.5%)                | n/c                       | -        |
| maternal condition                                              | 0 / 519 (0.0%)                 | 22 / 123 (17.9%)                | n/c                       | -        |
| elective / maternal wish                                        | 0 / 519 (0.0%)                 | 0 / 123 (0.0%)                  | n/c                       | -        |
| >24 h of ruptured membranes                                     | 0 / 519 (0.0%)                 | 4 / 123 (3.3%)                  | n/c                       | -        |
| other                                                           | 0 / 519 (0.0%)                 | 0 / 123 (0.0%)                  | n/c                       | -        |
| Use of oxytocin                                                 | 402 (65.8%)                    | 255 (39.4%)                     | 1.69 (1.49 to 1.87)       | <0.001   |
| Use of tocolytics                                               | 20 (3.3%)                      | 13 (2.0%)                       | 1.63 (0.82 to 3.25)       | 0.17     |
| Maternal intrapartum infection                                  |                                |                                 |                           |          |
| fever during labour (≥38 °C)                                    | 33 (5.4%)                      | 35 (5.4%)                       | 0.99 (0.63 to 1.59)       | 0.99     |
| use of antibiotics                                              | 34 (5.6%)                      | 22 (3.4%)                       | 1.64 (0.97 to 2.77)       | 0.07     |
| Meconium stained amniotic fluid                                 | 82 (13.4%)                     | 163 (25.2%)                     | 0.53 (0.42 to 0.68)       | 0.001    |
| Level of care at time of birth                                  |                                |                                 |                           |          |
| Primary care                                                    | 44 (7.2%)                      | 221 (34.2%)                     | n/c                       | -        |
| Secondary care                                                  | 567 (92.8%)                    | 426 (65.8%)                     | n/c                       | -        |
| Mode of delivery                                                |                                |                                 |                           |          |
| spontaneous vaginal delivery                                    | 484 (79.2%)                    | 493 (76.2%)                     | 1.04 (0.98 to 1.10)       | 0.20     |
| operative vaginal delivery                                      | 56 (9.2%)                      | 80 (12.4%)                      | 0.74 (0.54 to 1.02)       | 0.07     |
| (secondary) caesarean section                                   | 71 (11.6%)                     | 74 (11.4%)                      | 1.02 (0.75 to 1.38)       | 0.92     |
| Indication successful operative vaginal delivery                |                                |                                 |                           |          |
| failure to progress at second stage                             | 27 / 56 (48.2%)                | 37 / 80 (46.3%)                 | 1.04 (0.73 to 1.49)       | 0.82     |
| suspected fetal distress                                        | 24 / 56 (42.9%)                | 29 / 80 (36.3%)                 | 1.18 (0.78 to 1.80)       | 0.43     |
| suspected fetal distress and failure to progress                | 5 / 56 (8.9%)                  | 14 / 80 (17.5%)                 | 0.51 (0.19 to 1.34)       | 0.21‡    |
| maternal complication or other                                  | 0 / 56 (0.0%)                  | 0 / 80 (0.0%)                   | n/a                       | -        |
| Indication secondary caesarean section                          |                                |                                 |                           |          |
| failure to progress at first stage                              | 27 / 71 (38.0%)                | 16 / 74 (21.6%)                 | 1.76 (1.04 to 2.98)       | 0.04     |
| failure to progress at second stage                             | 8 / 71 (11.3%)                 | 12 / 74 (16.2%)                 | 0.69 (0.30 to 1.60)       | 0.39     |
| failed OVD                                                      | 3 / 71 (4.2%)                  | 9 / 74 (12.2%)                  | 0.35 (0.10 to 1.23)       | 0.13‡    |
| suspected fetal distress                                        | 14 / 71 (19.7%)                | 18 / 74 (24.3%)                 | 0.81 (0.44 to 1.50)       | 0.51     |
| suspected fetal distress and failure to progress at first stage | 3 / 71 (4.2%)                  | 7 / 74 (9.5%)                   | 0.45 (0.12 to 1.66)       | 0.33‡    |

|                                                                  |                 |                |                     |       |
|------------------------------------------------------------------|-----------------|----------------|---------------------|-------|
| suspected fetal distress and failure to progress at second stage | 3 / 71 (4.2%)   | 3 / 74 (4.1%)  | 0.96 (0.22 to 4.99) | 1.00† |
| maternal complication or other                                   | 13 / 71 (18.3%) | 9 / 74 (12.2%) | 1.51 (0.69 to 3.30) | 0.31  |

13 **Delivery outcomes (per-protocol).** Data are n (%), mean and standard deviation, or median (IQR). OVD:  
14 Operative Vaginal Delivery. \* Mean difference between groups with 95% confidence interval. †Mann-Whitney  
15 U test. ‡Fisher's exact test.

16  
17

18 **(Adverse) maternal outcomes**

|                                            | <b>Induction of labour<br/>(n=611)</b> | <b>Expectant<br/>management<br/>(n=647)</b> | <b>Relative risk<br/>(95% CI)</b> | <b>p-value</b> |
|--------------------------------------------|----------------------------------------|---------------------------------------------|-----------------------------------|----------------|
| Composite adverse maternal outcome*        | 84 (13.7%)                             | 75 (11.6%)                                  | 1.19 (0.89 to 1.59)               | 0.25           |
| Maternal death                             | 0 (0.0%)                               | 0 (0.0%)                                    | n/a                               | -              |
| Post-partum blood loss                     |                                        |                                             |                                   |                |
| < 1000 mL (reference)                      | 552 (90.3%)                            | 592 (91.5%)                                 | 1.00                              | -              |
| ≥ 1000 mL                                  | 59 (9.7%)                              | 55 (8.5%)                                   | 1.14 (0.80 to 1.61)               | 0.48           |
| 1000-1500 mL                               | 23 (3.8%)                              | 27 (4.2%)                                   | 0.92 (0.53 to 1.58)               | 0.76           |
| >1500-2000 mL                              | 15 (2.5%)                              | 10 (1.6%)                                   | 1.59 (0.72 to 3.52)               | 0.25           |
| > 2000 mL                                  | 21 (3.4%)                              | 18 (2.8%)                                   | 1.24 (0.67 to 2.31)               | 0.49           |
| Post-partum blood loss (mL; median, IQR)   | 300 (200 – 500)                        | 300 (250 – 500)                             | -                                 | 0.18†          |
| Transfusion (packed cells or plasma)       | 18 (2.9%)                              | 13 (2.0%)                                   | 1.47 (0.72 to 2.97)               | 0.29           |
| Manual removal placenta                    | 29 (5.4%)                              | 26 (4.5%)                                   | 1.18 (0.71 to 1.98)               | 0.52           |
| Perineal tear                              |                                        |                                             |                                   |                |
| episiotomy (without tear)                  | 150 / 540 (27.8%)                      | 181 / 573 (31.6%)                           | 0.88 (0.73 to 1.05)               | 0.17           |
| OASIS                                      | 16 / 540 (3.0%)                        | 21 / 573 (3.7%)                             | 0.81 (0.43 to 1.53)               | 0.51           |
| third degree tear                          | 10 / 540 (1.9%)                        | 14 / 573 (2.4%)                             | 0.79 (0.40 to 1.55)               | 0.49           |
| fourth degree tear                         | 5 / 540 (0.9%)                         | 5 / 573 (0.9%)                              | 1.06 (0.31 to 3.64)               | 1.00‡          |
| episiotomy and third degree tear           | 0 / 540 (0.0%)                         | 1 / 573 (0.2%)                              | -                                 | -              |
| episiotomy and fourth degree tear          | 1 / 540 (0.2%)                         | 1 / 573 (0.2%)                              | 1.06 (0.07 to 16.92)              | 1.00‡          |
| Maternal admission (highest level of care) |                                        |                                             |                                   |                |
| intensive care                             | 3 (0.5%)                               | 2 (0.3%)                                    | 1.59 (0.27 to 9.47)               | 0.61‡          |
| medium care                                | 4 (0.7%)                               | 4 (0.6%)                                    | 1.06 (0.27 to 4.22)               | 1.00‡          |
| ward                                       | 196 (32.1%)                            | 209 (32.3%)                                 | 0.99 (0.85 to 1.17)               | 0.93           |
| Indications for maternal admission         |                                        |                                             |                                   |                |
| Thromboembolic complications               | 0 (0.0%)                               | 0 (0.0%)                                    | n/a                               | -              |
| Hypertensive disorders§                    | 3 (0.5%)                               | 13 (2.0%)                                   | 0.24 (0.07 to 0.85)               | 0.02‡          |
| Post-partum blood loss                     | 34 (5.6%)                              | 40 (6.2%)                                   | 0.90 (0.58 to 1.40)               | 0.64           |
| Post-caesarean                             | 71 (11.6%)                             | 74 (11.4%)                                  | 1.02 (0.75 to 1.38)               | 0.92           |
| Pain treatment during labour               | 309 (50.6%)                            | 278 (43.0%)                                 | 1.18 (1.05 to 1.33)               | 0.007          |
| Remifentanyl                               | 93 (15.2%)                             | 89 (13.8%)                                  | 1.11 (0.85 to 1.45)               | 0.46           |
| Pethidine / phenergan / other opiates      | 47 (7.7%)                              | 33 (5.1%)                                   | 1.51 (0.98 to 2.32)               | 0.06           |
| Epidural / spinal                          | 194 (31.4%)                            | 173 (26.6%)                                 | 1.19 (1.00 to 1.41)               | 0.05           |
| Others                                     | 1 (0.2%)                               | 4 (0.6%)                                    | 0.26 (0.03 to 2.36)               | 0.38‡          |

19 **(Adverse) maternal outcomes (per-protocol).** \*Defined as post-partum haemorrhage ≥ 1000 mL, and/or  
20 manual removal of placenta, and/or third or fourth degree tears (Obstetrical Anal Sphincter Injuries, OASIS),  
21 and/or intensive care admission, and/or maternal death. Denominator for perineal tear are vaginal deliveries  
22 only. †Mann Whitney U test. ‡Fisher's exact test. §Including (pre-)eclampsia, and HELLP syndrome.

23
